# Supplementary material for: Predictive Factors of Renal Recovery and Progression to End-Stage Kidney Disease in Patients With Antineutrophil Cytoplasmic Autoantibody-Associated Vasculitis With Severe Kidney Disease
Source: PubMed Central journal article supplement (PMC11068975; doi:10.1016/j.ekir.2024.02.1431), 2024-03-06
Supplement: mmc1.pdf [file mmc1.pdf]

## Supplementary Material

### Supplementary Methods

*Statistical analysis. (i) Logistic regression.* Variables were considered for the multivariable logistic regression models if they occurred before the development of the outcome of interest, had <10% of missing values, had p values less than 0.05 in the univariable analysis and were clinically plausible. The final model was determined using both clinical and statistical criteria, taking into consideration collinearity, interaction and the number of patients who experienced the outcome of interest. Some of the continuous variables were categorized with cut-offs determined according to pre-established guidelines or clinical practice. The odds ratio (OR) with 95% confidence intervals (95%CI) were reported when appropriate. The results derived from these analyses are described on the *Supplementary Material*.

*(ii) The Kaplan Meier method and Cox proportional hazards regression models.*

Patients who did not experience a relevant outcome were censored in survival analyses but excluded in reporting of cumulative incidences of outcomes at specific times if they were not observed for the entire duration. We excluded an observation from the analysis if the underlying outcome could not be ascertained. A multivariable Cox proportional hazards regression model was used to assess the predictive factors of renal recovery and ESKD at 12 months. We adjusted all our multivariate models for the use of PLEX regardless of the significance obtained in the univariate model.

### Supplementary Results

*Renal function recovery at 12 months (n= 145).* Multivariable logistic regression analysis showed that SCr at diagnosis, erythrocyte sedimentation rate and minimal/mild

chronicity changes on biopsies were the most important predictive factors for renal recovery, even when adjusted for treatment with PLEX (*Supplementary Table S5*).

***ESKD within 12 months (n=150)*** Multivariable logistic regression analysis showed that higher SCr, lower hemoglobin at diagnosis and moderate to severe chronicity grading on kidney biopsy were the most important predictive factors for progression to ESKD at 12 months, even when adjusted for the treatment with PLEX (*Supplementary Table S6*).

***Transient versus persistent need for dialysis (n=71)***. Multivariable logistic regression analysis showed that minimal chronicity changes or focal involvement were the most important predictors of transient dialysis, even when adjusted for the treatment with PLEX (*Supplementary Table S7*).

***PLEX as adjunct to remission-induction therapy in patients that started dialysis in the first 4 weeks of diagnosis (n=71)***. We then further analyzed the 36 patients treated with PLEX among the 71 patients who underwent dialysis within 4 weeks. Of these 36 patients, 16 patients were dialysis-independent at 12 months and 20 remained dialysis-dependent at 12 months. Patients who became dialysis-independent following PLEX more frequently had diagnosis of GPA (62.5% vs. 35.0%, p=0.101), PR3-ANCA (65.0% vs. 40.0%, p=0.180), a SCr <5.7 mg/dL (68.8% vs. 25.0%, p=0.009), and had minimal/mild chronicity changes on kidney biopsies (81.3% vs. 55.0%, p=0.097). Conversely, of the 35 patients that were not treated with PLEX, 11 were dialysis-independent at 12 months, whereas 24 remained dialysis-dependent. Patients who became dialysis-independent without PLEX more often had a diagnosis of GPA diagnosis (63.6% vs. 36.4%, p=0.227), were PR3-ANCA positive (63.6% vs. 36.4%, p=0.227), and had minimal/mild chronicity changes on the kidney biopsy (63.6% vs. 29.2%, p=0.053). The

proportion of patients with SCr <5.7 mg/dL was not different between patients who became dialysis-independent vs. who remained on dialysis (63.5% vs. 58.3%,p=0.766) in this subset.

***Remission-induction therapy in patients with eGFR <15 mL/min/1.73 m<sup>2</sup> and/or dialysis dependent (n=166).*** In the 166 patients, 81 (51.9%) patients received cyclophosphamide (CYC) for remission-induction whereas 69 (44.2%) patients received rituximab (RTX) (*Supplementary Table S9*). In the remaining 10 patients, 3 (1.8%) were treated with MMF and in 7 (4.2%) patients only prednisone was used for remission-induction treatment mainly due to contraindication to CYC (*Supplementary Table S1*). When comparing CYC vs. RTX, we excluded from the analysis the 6 patients from the Vall d'Hebron cohort that have received both CYC and RTX. There were no differences on the BVAS/WG scores, frequency of alveolar hemorrhage between groups, and SCr and eGFR at diagnosis. A higher proportion of patients scored as moderate in the chronicity score in the RTX group (55.1% vs. 39.5%,p=0.024). PLEX was added to standard immunosuppressive remission-induction therapy more frequently in patients who received CYC (42.0% vs. 15.9%,p=0.001) whereas IV methylprednisolone was more commonly added in patients treated with RTX (91.3% vs. 67.9%,p<0.001). Patients who received CYC relapsed more (33.3% vs. 15.9%,p=0.015). There were no differences between groups in the frequency of renal recovery, dialysis (permanent or transient), ESKD at 12 months or infections. Patients treated with CYC had worse survival, 37 (45.7%) died when compared with 17 (24.6%) in the RTX group (p=0.007). In the decade analysis, treatment choices reflected the standard of care with the incremental use of RTX and discontinuation of addition of PLEX in the more recent years (*Supplementary Table S10*). Importantly, renal recovery and survival improved along the years whereas the ESKD frequency remained constant between decades, highlighting this unmet need.

## Supplementary Tables

**Supplementary Table S1** - Demographic and clinical characteristics of patients Anti-Neutrophil Cytoplasmic Antibodies (ANCA) associated vasculitis (AAV) patients with glomerulonephritis (AAV-GN) and eGFR < 15 mL/min/1.73 m<sup>2</sup> at diagnosis (n=166).

**Supplementary Table S2** - Outcomes of patients with Anti-Neutrophil Cytoplasmic Antibodies (ANCA) associated vasculitis (AAV) patients with glomerulonephritis (AAV-GN) and eGFR < 15 mL/min/1.73 m<sup>2</sup> at diagnosis (n=166).

**Supplementary Table S3** - Clinical characteristics and Outcomes with Anti-Neutrophil Cytoplasmic Antibodies (ANCA) associated vasculitis (AAV) patients with glomerulonephritis (AAV-GN) and eGFR < 15 mL/min/1.73 m<sup>2</sup> according with the center (n=166).

**Supplementary Table S4** - Clinical characteristics and Outcomes with Anti-Neutrophil Cytoplasmic Antibodies (ANCA) associated vasculitis (AAV) patients with glomerulonephritis (AAV-GN) and eGFR < 15 mL/min/1.73 m<sup>2</sup> stratified by patients who started dialysis after 4 weeks vs. within 4 weeks.

**Supplementary Table S5** – Univariable and Multivariable logistic regression of the predictive factors for renal recovery at 12 months.

**Supplementary Table S6** – Univariable and Multivariable logistic regression of the predictive factors for ESKD at 12 months.

**Supplementary Table S7** – Clinical characteristics and Outcomes with Anti-Neutrophil Cytoplasmic Antibodies (ANCA) associated vasculitis (AAV) patients with glomerulonephritis (AAV-GN) and eGFR < 15 mL/min/1.73 m<sup>2</sup> at diagnosis according with the status of treatment with plasma exchange (PLEX) (n=166).

**Supplementary Table S8** – Clinical characteristics and Outcomes with Anti-Neutrophil Cytoplasmic Antibodies (ANCA) associated vasculitis (AAV) patients with glomerulonephritis (AAV-GN) and eGFR < 15 mL/min/1.73 m<sup>2</sup> at diagnosis who started dialysis in the first 4 weeks of AAV-GN diagnosis according with PLEX status (n=71).

**Supplementary Table S9** - Clinical characteristics and Outcomes with Anti-Neutrophil Cytoplasmic Antibodies (ANCA) associated vasculitis (AAV) patients with glomerulonephritis (AAV-GN) and eGFR < 15 mL/min/1.73 m<sup>2</sup> at diagnosis according with remission-induction treatment.

**Supplementary Table S10** - Clinical characteristics and Outcomes with Anti-Neutrophil Cytoplasmic Antibodies (ANCA) associated vasculitis (AAV) patients with glomerulonephritis (AAV-GN) and eGFR < 15 mL/min/1.73 m<sup>2</sup> according with the decade.

**Supplementary Table S11** - Clinical characteristics and Outcomes with Anti-Neutrophil Cytoplasmic Antibodies (ANCA) associated vasculitis (AAV) patients with glomerulonephritis (AAV-GN) and eGFR < 15 mL/min/1.73 m<sup>2</sup> and/or at dialysis within the first 4 weeks at diagnosis according with remission-induction treatment.

**Supplementary Table S1** - Demographic and clinical characteristics of patients Anti-Neutrophil Cytoplasmic Antibodies (ANCA) associated vasculitis (AAV) patients with glomerulonephritis (AAV-GN) and eGFR < 15 mL/min/1.73 m<sup>2</sup> at diagnosis (n=166).

|                                                            | AAV-GN with eGFR < 15 mL/min/1.73 m <sup>2</sup> at diagnosis<br>n = 166 |
|------------------------------------------------------------|--------------------------------------------------------------------------|
| Age at renal involvement diagnosis, median (IQR) years     | 67 (58-75)                                                               |
| Male, n (%)                                                | 88 (53.0)                                                                |
| Disease presentation, n (%)                                |                                                                          |
| AAV new diagnosis                                          | 147 (88.6)                                                               |
| AAV relapse                                                | 19 (11.4)                                                                |
| AAV, n (%)                                                 |                                                                          |
| MPA                                                        | 102 (61.4)                                                               |
| GPA                                                        | 64 (38.6)                                                                |
| ANCA specificity (ELISA), n (%)                            |                                                                          |
| MPO                                                        | 109 (65.7)                                                               |
| PR3                                                        | 57 (34.3)                                                                |
| BVAS/WG at renal involvement diagnosis, median (IQR)       | 7 (7-9)                                                                  |
| Alveolar hemorrhage, n (%)                                 | 32 (19.3)                                                                |
| Cardiovascular risk factors, n (%)                         |                                                                          |
| Arterial hypertension                                      | 130 (78.3)                                                               |
| Diabetes mellitus                                          | 43 (25.9)                                                                |
| Dyslipidemia                                               | 76 (45.8)                                                                |
| BMI > 30 Kg/m <sup>2</sup>                                 | 51 (30.3)                                                                |
| Laboratory findings                                        |                                                                          |
| Hemoglobin, mean (sd) g/dL                                 | 9.3 (1.67)                                                               |
| ESR, median (IQR) mm/1 <sup>st</sup> h                     | 70 (44.2-95.0)                                                           |
| SCr at diagnosis, median (IQR) mg/dL                       | 4.7 (3.4-6.3)                                                            |
| eGFR at diagnosis, median (IQR), mL/min/1.73m <sup>2</sup> | 10.5 (7.3-14.1)                                                          |
| eGFR at 6 months, median (IQR), mL/min/1.73m <sup>2</sup>  | 25.4 (16.6-37.6)                                                         |
| eGFR at 12 months, median (IQR), mL/min/1.73m <sup>2</sup> | 25.1 (17.0-41.2)                                                         |
| Biopsy proven, n (%)                                       | 166 (100.0)                                                              |
| MCCS, n (%)                                                |                                                                          |
| Minimal                                                    | 28 (16.9)                                                                |
| Mild                                                       | 57 (34.3)                                                                |
| Moderate                                                   | 50 (30.1)                                                                |
| Severe                                                     | 31 (18.7)                                                                |
| MCCS, median (IQR), points                                 | 4 (2.8 – 7.0)                                                            |
| Intervention                                               |                                                                          |
| Remission-induction treatment, n (%)                       |                                                                          |

|                                                     |            |
|-----------------------------------------------------|------------|
| Cyclophosphamide                                    | 84 (50.6)  |
| Rituximab                                           | 72 (43.4)  |
| PDN only                                            | 7 (4.2)    |
| Mycophenolate mofetil                               | 3 (1.8)    |
| Glucocorticoids, n (%)                              |            |
| IV methylprednisolone                               | 128 (77.1) |
| Oral prednisone                                     | 38 (22.9)  |
| Plasma exchange therapy, n (%)                      | 49 (29.5)  |
| Maintenance treatment, n (%)                        |            |
| Rituximab                                           | 39 (23.5)  |
| Azathioprine                                        | 35 (21.1)  |
| Mycophenolate mofetil                               | 34 (20.5)  |
| Prednisone                                          | 16 (9.6)   |
| Cyclophosphamide                                    | 7 (4.2)    |
| Methotrexate                                        | 1 (0.6)    |
| No remission-maintenance or impossible to determine | 21 (12.6)  |

**Abbreviations:** AAV - antineutrophil cytoplasmic antibody associated vasculitis; ANCA - anti-neutrophil cytoplasmic antibody; BVAS/WG - Birmingham vasculitis activity score for Wegener granulomatosis; eGFR – estimated glomerular filtration rate; ESR - erythrocyte sedimentation rate; GPA - granulomatosis with polyangiitis; IQR - interquartile range; IV – intravenous; MCCA – Mayo Clinic Chronicity Score; MPA - microscopic polyangiitis; MPO - myeloperoxidase; n- number; PLEX – Plasma exchange; PR3 - proteinase 3; SCr - serum creatinine.

**Supplementary Table S2 - Outcomes of patients with Anti-Neutrophil Cytoplasmic Antibodies (ANCA) associated vasculitis (AAV) patients with glomerulonephritis (AAV-GN) and eGFR < 15 mL/min/1.73 m<sup>2</sup> at diagnosis (n=166).**

|                                                                   | AAV-GN with eGFR < 15 mL/min/1.73 m <sup>2</sup> at diagnosis<br>n = 166 |
|-------------------------------------------------------------------|--------------------------------------------------------------------------|
| <b>Outcomes</b>                                                   |                                                                          |
| Remission                                                         | 136 (83.4)                                                               |
| Relapse                                                           | 41 (24.7)                                                                |
| Death                                                             | 59 (35.5)                                                                |
| Renal, n (%)                                                      |                                                                          |
| ESKD                                                              |                                                                          |
| 12 months                                                         | 50 (33.3)                                                                |
| Dialysis                                                          | 106 (63.9)                                                               |
| Dialysis within 4 weeks of AAV-GN diagnosis                       | 71 (42.8)                                                                |
| Transient Dialysis                                                | 32 (19.3)                                                                |
| Permanent Dialysis                                                | 74 (44.6)                                                                |
| Renal function recovery to an eGFR > 15 mL/min/1.73m <sup>2</sup> |                                                                          |
| 12 months                                                         | 70 (42.2)                                                                |
| Infection within 12 months, n (%)                                 | 66 (39.8)                                                                |
| Time of FU after renal involvement, median (IQR) years            | 4.0 (1.41 – 6.8)                                                         |

# - “Total” corresponds to the number of the event documented in all time of follow-up.

**Abbreviations:** AAV – anti-neutrophil cytoplasmic antibody associated vasculitis; eGFR – estimated glomerular filtration rate; FU – follow-up; IQR – interquartile range; KF – kidney failure; n - number.

**Supplementary Table S3 - Clinical characteristics and Outcomes with Anti-Neutrophil  
Cytoplasmic Antibodies (ANCA) associated vasculitis (AAV) patients with glomerulonephritis  
(AAV-GN) and eGFR < 15 mL/min/1.73 m<sup>2</sup> according with the center (n=166).**

|                                                                              | Mayo Clinic<br>n = 142 (85.5%) | Vall d'Hebron<br>n = 24 (14.5%) | p-value      |
|------------------------------------------------------------------------------|--------------------------------|---------------------------------|--------------|
| Age at diagnosis, median (IQR) years                                         | 67 (59.8 – 75.9)               | 69 (57.3 – 76.0)                | 0.845        |
| Male, n (%)                                                                  | 73 (51.4)                      | 15 (62.5)                       | 0.314        |
| AAV, n (%)                                                                   |                                |                                 | <b>0.017</b> |
| MPA                                                                          | 82 (57.7)                      | 20 (83.3)                       |              |
| GPA                                                                          | 60 (42.3)                      | 4 (16.7)                        |              |
| ANCA specificity (ELISA), n (%)                                              |                                |                                 | <b>0.049</b> |
| MPO                                                                          | 89 (62.7)                      | 20 (83.3)                       |              |
| PR3                                                                          | 53 (37.3)                      | 4 (16.7)                        |              |
| BVAS/WG at diagnosis, median (IQR)                                           | 7 (7-9)                        | 7 (7-10)                        | 0.429        |
| Alveolar hemorrhage BVAS/WG at diagnosis, n (%)                              | 26 (18.3)                      | 6 (25.0)                        | 0.442        |
| Cardiovascular risk factors, n (%)                                           |                                |                                 |              |
| Arterial hypertension                                                        | 113 (79.6)                     | 17 (70.8)                       | 0.336        |
| Diabetes mellitus                                                            | 39 (27.5)                      | 4 (16.4)                        | 0.264        |
| Dyslipidemia                                                                 | 68 (47.9)                      | 8 (33.3)                        | 0.186        |
| BMI > 30 kg/m <sup>2</sup>                                                   | 48 (33.8)                      | 3 (12.5)                        | 0.110        |
| Laboratory findings                                                          |                                |                                 |              |
| Hemoglobin, mean (sd) g/dL                                                   | 9.3 (1.65)                     | 9.2 (1.80)                      | 0.935        |
| ESR, median (IQR) mm/1 <sup>st</sup> h                                       | 67 (43.0 – 93.0)               | 96 (44.0 – 120.0)               | 0.069        |
| SCr at diagnosis, median (IQR) mg/dL                                         | 4.6 (3.3 – 5.8)                | 5.0 (3.6 – 8.1)                 | 0.157        |
| eGFR at diagnosis of renal involvement, mean (sd), mL/min/1.73m <sup>2</sup> | 10.6 (7.43 - 13.89)            | 9.4 (5.96 – 14.88)              | 0.538        |
| MCCS, n (%)                                                                  |                                |                                 | 0.129        |
| Minimal                                                                      | 26 (18.3)                      | 2 (8.3)                         | 0.227        |
| Mild                                                                         | 51 (35.9)                      | 6 (25.0)                        | 0.285        |
| Moderate                                                                     | 38 (26.8)                      | 12 (50.0)                       | <b>0.022</b> |
| Severe                                                                       | 27 (19.0)                      | 4 (16.7)                        | 0.785        |
| MCCS, median (IQR), points                                                   | 4 (2.0 - 7.0)                  | 6 (3.0 - 7.0)                   | 0.100        |
| Remission-induction treatment, n (%)                                         |                                |                                 | 0.170        |
| Cyclophosphamide                                                             | 74 (56.1)                      | 7 (38.9)                        |              |
| Rituximab                                                                    | 58 (43.9)                      | 11 (61.1)                       |              |
| Remission-induction adjuvant therapies, n (%)                                |                                |                                 |              |
| Plasma exchange therapy                                                      | 38 (26.8)                      | 11 (45.8)                       | 0.058        |
| IV methylprednisolone at induction remission                                 | 106 (74.6)                     | 22 (91.7)                       | 0.066        |
| Outcomes, n (%)                                                              |                                |                                 |              |
| Relapse                                                                      | 33 (23.2)                      | 8 (33.3)                        | 0.289        |
| Renal recovery                                                               | 69 (51.9)                      | 12 (54.5)                       | 0.817        |
| Dialysis                                                                     |                                |                                 | 0.649        |
| Permanent                                                                    | 63 (44.4)                      | 11 (45.8)                       |              |
| Transient                                                                    | 26 (18.3)                      | 6 (25.0)                        |              |
| ESKD                                                                         |                                |                                 |              |
| 12 months                                                                    | 50 (35.2)                      | 10 (41.7)                       | 0.543        |
| Death                                                                        | 51 (35.9)                      | 8 (33.3)                        | 0.807        |
| Infection                                                                    | 28 (19.7)                      | 6 (25.0)                        | 0.311        |
| Time of FU after renal involvement, median (IQR) months                      | 43 (16.0 – 82.5)               | 56 (17.5 – 79.3)                | 0.963        |

**Supplementary Table S4 - Clinical characteristics and Outcomes with Anti-Neutrophil  
Cytoplasmic Antibodies (ANCA) associated vasculitis (AAV) patients with glomerulonephritis  
(AAV-GN) and eGFR < 15 mL/min/1.73 m<sup>2</sup> stratified by patients who started dialysis after 4  
weeks vs. within 4 weeks.**

|                                                                              | Dialysis after 4 weeks<br>n = 35 (33.0%) | Dialysis within 4 weeks<br>n = 71 (67.0%) | p-value           |
|------------------------------------------------------------------------------|------------------------------------------|-------------------------------------------|-------------------|
| Age at diagnosis, median (IQR) years                                         | 65 (50.0 – 73.3)                         | 66 (58.0 – 73.0)                          | 0.362             |
| Male, n (%)                                                                  | 11 (31.4)                                | 47 (66.2)                                 | <b>0.001</b>      |
| AAV, n (%)                                                                   |                                          |                                           | 0.295             |
| MPA                                                                          | 22 (62.9)                                | 37 (52.1)                                 |                   |
| GPA                                                                          | 13 (37.1)                                | 34 (47.9)                                 |                   |
| ANCA specificity (ELISA), n (%)                                              |                                          |                                           | <b>0.009</b>      |
| MPO                                                                          | 27 (77.1)                                | 36 (50.7)                                 |                   |
| PR3                                                                          | 8 (22.9)                                 | 35 (49.3)                                 |                   |
| BVAS/WG at diagnosis, median (IQR)                                           | 7 (7-9)                                  | 9 (7-10)                                  | 0.094             |
| Alveolar hemorrhage BVAS/WG at diagnosis, n (%)                              | 6 (17.1)                                 | 21 (29.6)                                 | 0.167             |
| Cardiovascular risk factors, n (%)                                           |                                          |                                           |                   |
| Arterial hypertension                                                        | 29 (82.9)                                | 54 (76.1)                                 | 0.424             |
| Diabetes mellitus                                                            | 8 (22.9)                                 | 22 (31.0)                                 | 0.382             |
| Dyslipidemia                                                                 | 17 (48.6)                                | 34 (47.9)                                 | 0.947             |
| BMI > 30 kg/m <sup>2</sup>                                                   | 15 (42.9)                                | 23 (32.4)                                 | 0.552             |
| Laboratory findings                                                          |                                          |                                           |                   |
| Hemoglobin, mean (sd) g/dL                                                   | 10.0 (1.93)                              | 8.8 (1.66)                                | 0.218             |
| ESR, median (IQR) mm/1 <sup>st</sup> h                                       | 67 (31.5 – 90.3)                         | 70 (45.0 – 97.0)                          | 0.065             |
| SCr at diagnosis, median (IQR) mg/dL                                         | 3.4 (2.3 – 4.6)                          | 5.7 (4.2 – 8.6)                           | 0.165             |
| eGFR at diagnosis of renal involvement, mean (sd), mL/min/1.73m <sup>2</sup> | 10.6 (7.43 - 13.89)                      | 9.4 (5.96 – 14.88)                        | 0.182             |
| MCCS, n (%)                                                                  |                                          |                                           |                   |
| Minimal                                                                      | 6 (17.1)                                 | 13 (18.3)                                 | 0.883             |
| Mild                                                                         | 7 (20.0)                                 | 25 (35.2)                                 | 0.109             |
| Moderate                                                                     | 12 (34.3)                                | 22 (31.0)                                 | 0.732             |
| Severe                                                                       | 10 (28.6)                                | 11 (15.5)                                 | 0.112             |
| MCCS, median (IQR), points                                                   | 6 (3.0 - 9.0)                            | 4 (3.0 - 7.0)                             | <b>0.001</b>      |
| Remission-induction treatment, n (%)                                         |                                          |                                           | 0.782             |
| Cyclophosphamide                                                             | 18 (52.9)                                | 35 (53.0)                                 |                   |
| Rituximab                                                                    | 15 (44.1)                                | 27 (40.9)                                 |                   |
| Remission-induction adjuvant therapies, n (%)                                |                                          |                                           |                   |
| Plasma exchange therapy                                                      | 5 (14.3)                                 | 36 (50.7)                                 | <b>&lt;0.0001</b> |
| IV methylprednisolone at induction remission                                 | 21 (60.0)                                | 64 (90.1)                                 | <b>&lt;0.0001</b> |
| Outcomes, n (%)                                                              |                                          |                                           |                   |
| Relapse                                                                      | 9 (25.7)                                 | 19 (26.8)                                 | 0.909             |
| Renal recovery                                                               | 9 (25.7)                                 | 25 (36.2)                                 | 0.280             |
| Dialysis                                                                     |                                          |                                           | <b>0.012</b>      |
| Permanent                                                                    | 30 (85.7)                                | 44 (62.0)                                 |                   |
| Transient                                                                    | 5 (14.3)                                 | 27 (38.0)                                 |                   |
| ESKD                                                                         |                                          |                                           |                   |
| 12 months                                                                    | 14 (40.0)                                | 44 (52.0)                                 | <b>0.033</b>      |
| Death                                                                        | 11 (31.4)                                | 28 (39.4)                                 | 0.421             |
| Infection                                                                    | 4 (11.4)                                 | 18 (25.4)                                 | 0.311             |
| Time of FU after renal involvement, median (IQR) months                      | 60 (32.0 – 92.0)                         | 41 (12.0 – 82.0)                          | 0.529             |

**Supplementary Table S5** – Univariable and Multivariable logistic regression of the predictive factors for renal recovery at 12 months (n=145).

|                                             | <i>Univariable Analysis</i> |             |                 | <i>Multivariable Analysis (adjusted to PLEX)</i> |              |                 |
|---------------------------------------------|-----------------------------|-------------|-----------------|--------------------------------------------------|--------------|-----------------|
|                                             | OR                          | 95% CI      | <i>p</i> -value | OR                                               | 95% CI       | <i>p</i> -value |
| Age < 60 years                              | 1.719                       | 0.853-3.467 | 0.130           |                                                  |              |                 |
| Male                                        | 1.025                       | 0.532-1.974 | 0.941           |                                                  |              |                 |
| GPA                                         | 1.684                       | 0.894-3.173 | 0.107           |                                                  |              |                 |
| PR3                                         | 1.294                       | 0.646-2.593 | 0.467           |                                                  |              |                 |
| Alveolar hemorrhage                         | 0.742                       | 0.332-1.661 | 0.469           |                                                  |              |                 |
| Hb at diagnosis ----                        | 1.172                       | 0.945-1.454 | 0.148           |                                                  |              |                 |
| Erythrocyte sedimentation rate at diagnosis | 1.014                       | 1.002-1.025 | <b>0.021</b>    | 1.015                                            | 1.002-1.028  | <b>0.028</b>    |
| SCr at diagnosis                            | 0.829                       | 0.729-0.942 | <b>0.004</b>    | 0.793                                            | 0.654-0.962  | <b>0.018</b>    |
| eGFR at diagnosis                           | 0.995                       | 0.973-1.018 | 0.682           |                                                  |              |                 |
| MCCS                                        |                             |             |                 |                                                  |              |                 |
| Minimal                                     | 1.329                       | 0.558-3.168 | 0.521           | 4.225                                            | 1.726-10.340 | <b>0.002</b>    |
| Mild                                        | 2.613                       | 1.265-5.399 | <b>0.009</b>    | 4.225                                            | 1.726-10.340 | <b>0.002</b>    |
| Moderate                                    | 0.476                       | 0.230-0.987 | <b>0.046</b>    | ref.                                             | -            | -               |
| Severe                                      | 0.513                       | 0.217-1.212 | 0.128           | ref.                                             | -            | -               |
| MCCS score                                  | 0.848                       | 0.752-0.956 | <b>0.007</b>    |                                                  |              |                 |
| Intervention                                |                             |             |                 |                                                  |              |                 |
| Remission-induction treatment               |                             |             |                 |                                                  |              |                 |
| Rituximab (vs. CYC) ----                    | 1.271                       | 0.635-2.544 | 0.498           |                                                  |              |                 |
| Remission-induction adjuvant therapies      |                             |             |                 |                                                  |              |                 |
| Plasma exchange                             | 1.208                       | 0.590-2.475 | 0.605           | 1.805                                            | 0.596-5.467  | 0.296           |
| IV methylprednisolone                       | 1.167                       | 0.540-2.522 | 0.695           |                                                  |              |                 |

**Supplementary Table S6** – Univariable and Multivariable logistic regression of the predictive factors for ESKD at 12 months (n=166).

|                                             | <i>Univariable Analysis</i> |             |                   | <i>Multivariable Analysis (adjusted to PLEX)</i> |              |                 |
|---------------------------------------------|-----------------------------|-------------|-------------------|--------------------------------------------------|--------------|-----------------|
|                                             | OR                          | 95% CI      | <i>p</i> -value   | OR                                               | 95% CI       | <i>p</i> -value |
| Age < 60 years                              | 0.892                       | 0.449-1.772 | 0.892             |                                                  |              |                 |
| Male                                        | 1.558                       | 0.820-2.959 | 0.176             |                                                  |              |                 |
| GPA                                         | 1.268                       | 0.657-2.445 | 0.479             |                                                  |              |                 |
| PR3                                         | 0.933                       | 0.478-1.820 | 0.715             |                                                  |              |                 |
| Alveolar hemorrhage                         | 2.429                       | 1.073-5.496 | <b>0.033</b>      |                                                  |              |                 |
| Hb at diagnosis ----                        | 0.694                       | 0.553-0.872 | <b>0.002</b>      | 0.733                                            | 0.566-0.947  | <b>0.018</b>    |
| Erythrocyte sedimentation rate at diagnosis | 0.996                       | 0.985-1.007 | 0.457             |                                                  |              |                 |
| SCr at diagnosis                            | 1.399                       | 1.201-1.628 | <b>&lt;0.0001</b> | 1.365                                            | 1.143-1.631  | <b>0.001</b>    |
| eGFR at diagnosis                           | 0.928                       | 0.876-0.984 | <b>0.012</b>      |                                                  |              |                 |
| MCCS                                        |                             |             |                   |                                                  |              |                 |
| Minimal                                     | ref.                        | -           | -                 | ref.                                             | -            | -               |
| Mild                                        | 1.584                       | 0.537-4.526 | 0.415             | ref.                                             | -            | -               |
| Moderate                                    | 3.123                       | 1.073-4.644 | <b>0.035</b>      | 2.952                                            | 1.307-6.66   | <b>0.002</b>    |
| Severe                                      | 3.020                       | 0.715-3.84  | 0.059             | 4.400                                            | 1.716-11.282 | <b>0.002</b>    |
| MCCS score                                  | 1.159                       | 1.035-1.330 | 0.011             |                                                  |              |                 |
| Intervention                                |                             |             |                   |                                                  |              |                 |
| Remission-induction treatment               |                             |             |                   |                                                  |              |                 |
| Rituximab (vs. CYC) ----                    | 0.618                       | 0.315-1.214 | 0.163             |                                                  |              |                 |
| Remission-induction adjuvant therapies      |                             |             |                   |                                                  |              |                 |
| Plasma exchange                             | 1.694                       | 0.856-3.354 | 0.130             | 0.920                                            | 0.356-2.376  | 0.864           |
| IV methylprednisolone                       | 1.116                       | 0.522-2.387 | 0.778             |                                                  |              |                 |

**Supplementary Table S7 – Clinical characteristics and Outcomes with Anti-Neutrophil Cytoplasmic Antibodies (ANCA) associated vasculitis (AAV) patients with glomerulonephritis (AAV-GN) and eGFR < 15 mL/min/1.73 m<sup>2</sup> at diagnosis according with the status of treatment with plasma exchange (PLEX) (n=166).**

|                                                            | No PLEX<br>n = 117 (70.5%) | PLEX<br>n = 49 (29.5%) | <i>p-value</i>    |
|------------------------------------------------------------|----------------------------|------------------------|-------------------|
| Age at diagnosis, median (IQR) years                       | 68 (57-77)                 | 65 (59-72)             | 0.158             |
| Male, n (%)                                                | 57 (48.7)                  | 31 (63.3)              | 0.087             |
| AAV, n (%)                                                 |                            |                        | 0.277             |
| MPA                                                        | 75 (64.1)                  | 27 (55.1)              |                   |
| GPA                                                        | 42 (35.9)                  | 22 (44.9)              |                   |
| ANCA specificity (ELISA), n (%)                            |                            |                        | 0.064             |
| MPO                                                        | 82 (70.1)                  | 27 (55.1)              |                   |
| PR3                                                        | 35 (29.9)                  | 22 (44.9)              |                   |
| BVAS/WG at diagnosis, median (IQR)                         | 7 (7-9)                    | 8 (7-10)               | <b>0.013</b>      |
| Alveolar hemorrhage BVAS/WG at diagnosis, n (%)            | 14 (12.0)                  | 18 (36.7)              | <b>&lt;0.0001</b> |
| Cardiovascular risk factors, n (%)                         |                            |                        |                   |
| Arterial hypertension                                      | 95 (81.2)                  | 35 (71.4)              | 0.164             |
| Diabetes mellitus                                          | 32 (27.4)                  | 11 (22.4)              | 0.511             |
| Dyslipidemia                                               | 54 (46.2)                  | 22 (44.9)              | 0.882             |
| BMI > 30 kg/m <sup>2</sup>                                 | 37 (31.6)                  | 14 (28.6)              | 0.895             |
| Laboratory findings                                        |                            |                        |                   |
| Hemoglobin, mean (sd) g/dL                                 | 9.5 (1.66)                 | 8.8 (1.60)             | <b>0.019</b>      |
| ESR, median (IQR) mm/1 <sup>st</sup> h                     | 65 (40.8-91.5)             | 93 (45.1-112.5)        | <b>0.048</b>      |
| SCr at diagnosis, median (IQR) mg/dL                       | 4.1 (3.30-5.20)            | 5.8 (4.40-8.65)        | <b>&lt;0.0001</b> |
| eGFR at diagnosis, median (IQR), mL/min/1.73m <sup>2</sup> | 11.1 (7.90 – 14.71)        | 8.0 (5.75-12.37)       | <b>0.003</b>      |
| MCCS, n (%)                                                |                            |                        | <b>0.015</b>      |
| Minimal                                                    | 20 (17.1)                  | 8 (16.3)               | 0.900             |
| Mild                                                       | 32 (27.4)                  | 25 (51.0)              | <b>0.004</b>      |
| Moderate                                                   | 38 (32.5)                  | 12 (24.5)              | 0.307             |
| Severe                                                     | 27 (23.1)                  | 4 (8.2)                | <b>0.025</b>      |
| MCCS, median (IQR), points                                 | 5 (3-7)                    | 3 (2-6)                |                   |
| Remission-induction treatment, n (%)                       |                            |                        | <b>0.009</b>      |
| Cyclophosphamide                                           | 49 (41.9)                  | 35 (71.4)              | <b>&lt;0.0001</b> |
| Rituximab                                                  | 59 (50.4)                  | 13 (26.5)              | <b>0.005</b>      |
| Remission-induction adjuvant therapies, n (%)              |                            |                        |                   |
| IV methylprednisolone at induction remission               | 82 (70.1)                  | 46 (93.9)              | <b>0.001</b>      |
| Maintenance treatment, n (%)                               |                            |                        | 0.732             |
| Azathioprine                                               | 22 (18.8)                  | 13 (26.5)              |                   |
| Mycophenolate mofetil                                      | 21 (17.9)                  | 13 (26.5)              |                   |
| Rituximab                                                  | 29 (24.8)                  | 9 (18.4)               |                   |
| Prednisone                                                 | 12 (10.3)                  | 4 (8.2)                |                   |
| Outcomes, n (%)                                            |                            |                        |                   |
| Relapse                                                    | 23 (19.7)                  | 18 (36.7)              | <b>0.020</b>      |
| ESKD                                                       |                            |                        |                   |
| 12 months                                                  | 38 (32.5)                  | 22 (44.9)              | 0.129             |
| Dialysis                                                   |                            |                        | <b>&lt;0.0001</b> |
| Transient                                                  | 15 (12.8)                  | 17 (34.7)              | <b>0.001</b>      |
| Permanent                                                  | 50 (42.7)                  | 24 (49.0)              | 0.458             |
| Renal recovery                                             |                            |                        |                   |
| 12 months                                                  | 45 (48.4)                  | 26 (56.5)              | 0.367             |
| Death                                                      | 40 (34.2)                  | 19 (38.8)              | 0.573             |
| Infection                                                  | 44 (37.6)                  | 22 (44.9)              | 0.778             |
| Time of FU after renal involvement, median (IQR) months    | 35 (13.0-71.0)             | 60 (36.5 – 90.0)       | <b>0.027</b>      |

**Supplementary Table S8** – Clinical characteristics and Outcomes with Anti-Neutrophil Cytoplasmic Antibodies (ANCA) associated vasculitis (AAV) patients with glomerulonephritis (AAV-GN) and eGFR < 15 mL/min/1.73 m<sup>2</sup> at diagnosis who started dialysis in the first 4 weeks of AAV-GN diagnosis according with PLEX status (n=71).

|                                                            | No PLEX<br>n = 35 (48.3%) | PLEX<br>n = 36 (50.7%) | <i>p-value</i> |
|------------------------------------------------------------|---------------------------|------------------------|----------------|
| Age at diagnosis, median (IQR) years                       | 66 (56.0-73.2)            | 64 (58.7-72.9)         | 0.593          |
| Male, n (%)                                                | 22 (62.9)                 | 25 (69.4)              | 0.557          |
| AAV, n (%)                                                 |                           |                        | 0.909          |
| MPA                                                        | 18 (51.4)                 | 19 (52.8)              |                |
| GPA                                                        | 17 (48.6)                 | 19 (52.8)              |                |
| ANCA specificity (ELISA), n (%)                            |                           |                        | 0.904          |
| MPO                                                        | 18 (51.4)                 | 18 (50.0)              |                |
| PR3                                                        | 17 (48.6)                 | 18 (50.0)              |                |
| BVAS/WG at diagnosis, median (IQR)                         | 8 (7-9)                   | 9 (7-12)               | 0.312          |
| Alveolar hemorrhage BVAS/WG at diagnosis, n (%)            | 6 (17.1)                  | 15 (41.7)              | <b>0.024</b>   |
| Cardiovascular risk factors, n (%)                         |                           |                        |                |
| Arterial hypertension                                      | 27 (77.1)                 | 27 (75.0)              | 0.832          |
| Diabetes mellitus                                          | 12 (34.3)                 | 10 (27.8)              | 0.553          |
| Dyslipidemia                                               | 17 (48.6)                 | 17 (47.2)              | 0.909          |
| BMI > 30 kg/m <sup>2</sup>                                 | 14 (40.0)                 | 9 (25.0)               | 0.346          |
| Laboratory findings                                        |                           |                        |                |
| Hemoglobin, mean (sd) g/dL                                 | 9.0 (1.61)                | 8.8 (1.72)             | 0.740          |
| ESR, median (IQR) mm/1 <sup>st</sup> h                     | 66 (45.5-93.0)            | 93 (45.0-112.0)        | 0.298          |
| SCr at diagnosis, median (IQR) mg/dL                       | 5.0 (3.7-7.4)             | 5.9 (4.9-9.2)          | 0.169          |
| eGFR at diagnosis, median (IQR), mL/min/1.73m <sup>2</sup> | 8.9 (6.26-14.65)          | 7.8 (5.19-11.56)       | 0.260          |
| MCCS, n (%)                                                |                           |                        | 0.098          |
| Minimal                                                    | 6 (17.1)                  | 7 (19.4)               | 0.803          |
| Mild                                                       | 8 (22.9)                  | 17 (47.2)              | <b>0.033</b>   |
| Moderate                                                   | 13 (37.1)                 | 9 (25.0)               | 0.274          |
| Severe                                                     | 8 (22.9)                  | 3 (8.3)                | 0.092          |
| MCCS, median (IQR), points                                 | 5 (3.0-8.0)               | 4 (3.0-6.0)            | 0.098          |
| Intervention                                               |                           |                        |                |
| Remission-induction treatment, n (%)                       |                           |                        |                |
| Cyclophosphamide                                           | 11 (31.4)                 | 26 (72.2)              | <b>0.004</b>   |
| Rituximab                                                  | 20 (57.1)                 | 9 (25.0)               | 0.116          |
| Remission-induction adjuvant therapies, n (%)              |                           |                        |                |
| IV methylprednisolone at induction remission               | 29 (82.9)                 | 35 (97.2)              | <b>0.042</b>   |
| Outcomes, n (%)                                            |                           |                        |                |
| Relapse                                                    | 6 (17.1)                  | 13 (36.1)              | 0.071          |
| ESKD                                                       |                           |                        |                |
| 12 months                                                  | 24 (68.6)                 | 20 (55.6)              | 0.259          |
| Dialysis                                                   |                           |                        | 0.259          |
| Transient                                                  | 11 (31.4)                 | 16 (44.4)              |                |
| Permanent                                                  | 24 (68.6)                 | 20 (55.6)              |                |
| Death                                                      | 14 (40.0)                 | 14 (38.9)              | 0.924          |
| Infection                                                  | 19 (54.3)                 | 16 (44.4)              | 0.833          |
| Time of FU after renal involvement, median (IQR) years     | 24 (8.0-61.0)             | 61 (32.0-92.3)         | <b>0.019</b>   |

**Supplementary Table S9** - Clinical characteristics and Outcomes with Anti-Neutrophil Cytoplasmic Antibodies (ANCA) associated vasculitis (AAV) patients with glomerulonephritis (AAV-GN) and eGFR < 15 mL/min/1.73 m<sup>2</sup> and/or at dialysis at diagnosis according with remission-induction treatment (n=166).

|                                      | Cyclophosphamide<br>n = 81 (51.9%) | Rituximab<br>n = 69 (44.2%) | <i>p-value</i> |
|--------------------------------------|------------------------------------|-----------------------------|----------------|
| Age at diagnosis, median (IQR) years | 67 (54.0 – 75.7)                   | 67 (60.0 – 77.7)            | 0.321          |
| Male, n (%)                          | 43 (53.1)                          | 37 (53.6)                   | 0.607          |
| AAV, n (%)                           |                                    |                             | 0.124          |
| MPA                                  | 44 (54.3)                          | 46 (66.7)                   |                |

|                                                                              |                   |                     |                   |
|------------------------------------------------------------------------------|-------------------|---------------------|-------------------|
| GPA                                                                          | 37 (45.7)         | 46 (45.1)           | 0.415             |
| ANCA specificity (ELISA), n (%)                                              |                   |                     |                   |
| MPO                                                                          | 50 (61.7)         | 47 (68.1)           |                   |
| PR3                                                                          | 31 (38.3)         | 22 (31.9)           |                   |
| BVAS/WG at diagnosis, median (IQR)                                           | 7 (7-9)           | 7 (7-8)             | 0.214             |
| Alveolar hemorrhage BVAS/WG at diagnosis, n (%)                              | 15 (18.5)         | 14 (20.3)           | 0.784             |
| Cardiovascular risk factors, n (%)                                           |                   |                     |                   |
| Arterial hypertension                                                        | 60 (74.1)         | 55 (79.7)           | 0.416             |
| Diabetes mellitus                                                            | 14 (17.3)         | 23 (33.3)           | <b>0.023</b>      |
| Dyslipidemia                                                                 | 33 (40.7)         | 36 (52.2)           | 0.161             |
| BMI > 30 kg/m <sup>2</sup>                                                   | 22 (27.2)         | 23 (33.3)           | 0.279             |
| Laboratory findings                                                          |                   |                     |                   |
| Hemoglobin, mean (sd) g/dL                                                   | 9.2 (1.54)        | 9.3 (1.85)          | 0.935             |
| ESR, median (IQR) mm/1 <sup>st</sup> h                                       | 78 (50.8 – 95.8)  | 51 (29.5 – 93.0)    | 0.051             |
| SCr at diagnosis, median (IQR) mg/dL                                         | 4.9 (3.4 – 6.1)   | 4.5 (3.4 - 6.3)     | 0.642             |
| eGFR at diagnosis of renal involvement, mean (sd), mL/min/1.73m <sup>2</sup> | 9.7 (7.2 - 13.69) | 11.3 (7.24 – 14.60) | 0.518             |
| MCCS, n (%)                                                                  |                   |                     |                   |
| Minimal                                                                      | 16 (19.8)         | 11 (15.9)           | 0.542             |
| Mild                                                                         | 30 (40.7)         | 20 (29.0)           | 0.133             |
| Moderate                                                                     | 19 (23.5)         | 28 (40.6)           | <b>0.024</b>      |
| Severe                                                                       | 13 (16.0)         | 10 (14.5)           | 0.792             |
| MCCS, median (IQR), points                                                   | 4 (2.0-7.0)       | 5 (3.0-7.0)         | 0.281             |
| Remission-induction adjuvant therapies, n (%)                                |                   |                     |                   |
| Plasma exchange therapy                                                      | 34 (42.0)         | 11 (15.9)           | <b>0.001</b>      |
| IV methylprednisolone at induction remission                                 | 55 (67.9)         | 63 (91.3)           | <b>&lt;0.001</b>  |
| Outcomes, n (%)                                                              |                   |                     |                   |
| Relapse                                                                      | 27 (33.3%)        | 11 (15.9)           | <b>0.015</b>      |
| Renal recovery                                                               | 36 (44.4)         | 25 (36.2)           | 0.745             |
| Dialysis                                                                     |                   |                     | 0.736             |
| Permanent                                                                    | 38 (46.9)         | 28 (40.6)           |                   |
| Transient                                                                    | 15 (18.5)         | 14 (20.3)           |                   |
| ESKD                                                                         |                   |                     |                   |
| 12 months                                                                    | 32 (39.5)         | 21 (30.4)           | 0.247             |
| Death                                                                        | 37 (45.7)         | 17 (24.6)           | <b>0.007</b>      |
| Infection                                                                    | 42 (43.8)         | 24 (34.3)           | 0.064             |
| Time of FU after renal involvement, median (IQR) months                      | 61 (30.0 – 125.5) | 29 (12.0 – 52.0)    | <b>&lt;0.0001</b> |

**Supplementary Table S10** - Clinical characteristics and Outcomes with Anti-Neutrophil Cytoplasmic Antibodies (ANCA) associated vasculitis (AAV) patients with glomerulonephritis (AAV-GN) and eGFR < 15 mL/min/1.73 m<sup>2</sup> according with the decade.

|                                      | 1996-2005<br>n = 38 (22.9%) | 2006-2015<br>n=61 (36.7%) | 2016-2021<br>n = 67 (40.4%) | p-value |
|--------------------------------------|-----------------------------|---------------------------|-----------------------------|---------|
| Age at diagnosis, median (IQR) years | 66 (48.6 – 78.9)            | 69 (61.0 – 75.3)          | 67 (60.0 – 73.0)            | 0.812   |
| Male, n (%)                          | 18 (47.4)                   | 34 (55.7)                 | 36 (53.7)                   | 0.711   |
| AAV, n (%)                           |                             |                           |                             | 0.117   |
| MPA                                  | 19 (50.0)                   | 43 (70.5)                 | 40 (59.7)                   |         |
| GPA                                  | 19 (50.0)                   | 28 (29.5)                 | 27 (40.3)                   |         |
| ANCA specificity (ELISA), n (%)      |                             |                           |                             | 0.400   |
| MPO                                  | 24 (63.2)                   | 44 (72.1)                 | 42 (61.2)                   |         |
| PR3                                  | 14 (36.8)                   | 17 (27.9)                 | 26 (38.8)                   |         |
| BVAS/WG at diagnosis, median (IQR)   | 7 (7-9)                     | 7 (7-10)                  | 7 (7-10)                    | 0.809   |

|                                                                              |                     |                    |                     |                   |
|------------------------------------------------------------------------------|---------------------|--------------------|---------------------|-------------------|
| Alveolar hemorrhage BVAS/WG at diagnosis, n (%)                              | 3 (17.9)            | 11 (18.0)          | 18 (26.9)           | 0.058             |
| Cardiovascular risk factors, n (%)                                           |                     |                    |                     |                   |
| Arterial hypertension                                                        | 38 (78.9)           | 45 (73.5)          | 55 (82.1)           | 0.519             |
| Diabetes mellitus                                                            | 7 (18.4)            | 12 (19.7)          | 24 (35.8)           | 0.056             |
| Dyslipidemia                                                                 | 12 (31.6)           | 29 (47.5)          | 35 (52.2)           | 0.117             |
| BMI > 30 kg/m <sup>2</sup>                                                   | 9 (23.7)            | 18 (29.5)          | 24 (35.8)           | 0.234             |
| Laboratory findings                                                          |                     |                    |                     |                   |
| Hemoglobin, mean (sd) g/dL                                                   | 9.2 (1.50)          | 9.6 (1.51)         | 9.1 (1.90)          | 0.198             |
| ESR, median (IQR) mm/1 <sup>st</sup> h                                       | 72 (47.0 – 93.0)    | 70 (39.0 – 102.0)  | 63 (44.0 – 120.0)   | 0.983             |
| SCr at diagnosis, median (IQR) mg/dL                                         | 4.5 (3.4 – 5.3)     | 4.3 (3.3 – 6.1)    | 4.7 (3.4 – 7.0)     | 0.600             |
| eGFR at diagnosis of renal involvement, mean (sd), mL/min/1.73m <sup>2</sup> | 10.5 (7.91 – 14.01) | 9.7 (7.01 – 14.08) | 10.7 (7.00 – 14.54) | 0.852             |
| MCCS, n (%)                                                                  |                     |                    |                     | 0.129             |
| Minimal                                                                      | 7 (18.4)            | 10 (16.4)          | 11 (16.4)           | 0.958             |
| Mild                                                                         | 12 (31.6)           | 24 (39.3)          | 21 (31.3)           | 0.585             |
| Moderate                                                                     | 11 (28.9)           | 15 (24.6)          | 24 (35.8)           | 0.378             |
| Severe                                                                       | 8 (21.2)            | 12 (19.7)          | 11 (16.4)           | 0.816             |
| MCCS, median (IQR), points                                                   | 4 (2.0 – 7.0)       | 4 (3.0-7.0)        | 5 (2.0 – 7.0)       | 0.939             |
| Remission-induction treatment, n (%)                                         |                     |                    |                     | <b>&lt;0.0001</b> |
| Cyclophosphamide                                                             | 35 (97.2)           | 39 (69.6)          | 7 (10.9)            |                   |
| Rituximab                                                                    | 1 (2.8)             | 15 (26.8)          | 53 (82.8)           |                   |
| Remission-induction adjuvant therapies, n (%)                                |                     |                    |                     |                   |
| Plasma exchange therapy                                                      | 5 (13.2)            | 28 (45.9)          | 16 (23.9)           | <b>0.001</b>      |
| IV methylprednisolone at induction remission                                 | 20 (52.6)           | 48 (78.7)          | 60 (89.6)           | <b>&lt;0.0001</b> |
| Outcomes, n (%)                                                              |                     |                    |                     |                   |
| Relapse                                                                      | 14 (36.8)           | 14 (23.0)          | 13 (19.4)           | 0.127             |
| Renal recovery                                                               | 8 (44.4)            | 28 (66.7)          | 24 (80.0)           | <b>0.041</b>      |
| Dialysis                                                                     |                     |                    |                     | 0.378             |
| Permanent                                                                    | 18 (47.4)           | 29 (47-5)          | 27 (40.3)           |                   |
| Transient                                                                    | 5 (13.2)            | 9 (14.8)           | 18 (26.9)           |                   |
| ESKD                                                                         |                     |                    |                     |                   |
| 12 months                                                                    | 11 (28.9)           | 17 (27.9)          | 16 (23.9)           | 0.767             |
| Death                                                                        | 23 (60.5)           | 23 (37.7)          | 13 (19.4)           | <b>&lt;0.0001</b> |
| Infection                                                                    | 5 (13.2)            | 11 (18.0)          | 18 (26.9)           | 0.311             |
| Time of FU after renal involvement, median (IQR) months                      | 65 (16.0 – 151.5)   | 61 (35.0 – 93.5)   | 25 (12.0 – 54.0)    | <b>&lt;0.0001</b> |

**Supplementary Table S11** - Clinical characteristics and Outcomes with Anti-Neutrophil Cytoplasmic Antibodies (ANCA) associated vasculitis (AAV) patients with glomerulonephritis (AAV-GN) and eGFR < 15 mL/min/1.73 m<sup>2</sup> and/or at dialysis within the first 4 weeks at diagnosis according with remission-induction treatment (n=71).

|                                                                              | Cyclophosphamide<br>n = 35 (53.0%) | Rituximab<br>n = 27 (40.9%) | <i>p</i> -value |
|------------------------------------------------------------------------------|------------------------------------|-----------------------------|-----------------|
| Age at diagnosis, median (IQR) years                                         | 66 (47.0 – 74.9)                   | 65 (60.0 – 72.0)            | 0.787           |
| Male, n (%)                                                                  | 26 (74.3)                          | 17 (63.0)                   | 0.338           |
| AAV, n (%)                                                                   |                                    |                             | 0.798           |
| MPA                                                                          | 18 (51.4)                          | 13 (48.1)                   |                 |
| GPA                                                                          | 17 (48.6)                          | 14 (51.9)                   |                 |
| ANCA specificity (ELISA), n (%)                                              |                                    |                             | 0.442           |
| MPO                                                                          | 19 (54.3)                          | 12 (44.4)                   |                 |
| PR3                                                                          | 16 (45.7)                          | 15 (55.6)                   |                 |
| BVAS/WG at diagnosis, median (IQR)                                           | 7 (7-9)                            | 7 (7-10)                    | 0.429           |
| Alveolar hemorrhage BVAS/WG at diagnosis, n (%)                              | 10 (28.6)                          | 9 (33.3)                    | 0.687           |
| Cardiovascular risk factors, n (%)                                           |                                    |                             |                 |
| Arterial hypertension                                                        | 25 (71.4)                          | 21 (77.8)                   | 0.571           |
| Diabetes mellitus                                                            | 7 (20.0)                           | 12 (44.4)                   | <b>0.038</b>    |
| Dyslipidemia                                                                 | 15 (42.9)                          | 16 (59.3)                   | 0.200           |
| BMI > 30 kg/m <sup>2</sup>                                                   | 7 (20.0)                           | 13 (48.1)                   | 0.051           |
| Laboratory findings                                                          |                                    |                             |                 |
| Hemoglobin, mean (sd) g/dL                                                   | 8.9 (1.63)                         | 8.7 (1.87)                  | 0.467           |
| ESR, median (IQR) mm/1 <sup>st</sup> h                                       | 91 (49.5 – 100.5)                  | 60 (33.5 – 93.0)            | 0.096           |
| SCr at diagnosis, median (IQR) mg/dL                                         | 5.7 (4.2 – 8.2)                    | 5.2 (4.1 – 8.7)             | 0.904           |
| eGFR at diagnosis of renal involvement, mean (sd), mL/min/1.73m <sup>2</sup> | 8.5 (5.92 – 13.59)                 | 8.0 (5.63 – 12.42)          | 0.893           |

|                                                         |                   |                 |              |
|---------------------------------------------------------|-------------------|-----------------|--------------|
| MCCS, n (%)                                             |                   |                 |              |
| Minimal                                                 | 7 (20.0)          | 5 (18.5)        | 0.884        |
| Mild                                                    | 15 (42.9)         | 8 (29.6)        | 0.285        |
| Moderate                                                | 9 (25.7)          | 11 (40.7)       | 0.209        |
| Severe                                                  | 4 (11.4)          | 3 (11.1)        | 0.969        |
| MCCS, median (IQR), points                              | 4 (3.0 - 7.0)     | 5 (2.0 - 7.0)   | 0.775        |
| Remission-induction adjuvant therapies, n (%)           |                   |                 |              |
| Plasma exchange therapy                                 | 25 (71.4)         | 8 (29.6)        | <b>0.001</b> |
| IV methylprednisolone at induction remission            | 30 (85.7)         | 26 (96.3)       | 0.162        |
| Remission-maintenance treatment, n (%)                  |                   |                 |              |
| Azathioprine                                            | 9 (25.7)          | 0 (0.0)         | -            |
| Mycophenolate mofetil                                   | 12 (34.3)         | 1 (3.7)         | 0.004        |
| No maintenance                                          | 5 (14.3)          | 11 (40.7)       | 0.020        |
| Rituximab                                               | 4 (11.4)          | 11 (40.7)       | 0.008        |
| Oral prednisone only                                    | 2 (5.7)           | 4 (14.8)        | 0.233        |
| Outcomes, n (%)                                         |                   |                 |              |
| Relapse                                                 | 15 (42.9)         | 2 (7.4)         | <b>0.002</b> |
| Renal recovery                                          | 13 (37.1)         | 9 (33.3)        | 0.756        |
| Dialysis                                                |                   |                 | 0.736        |
| Permanent                                               | 21 (60.0)         | 16 (59.3)       |              |
| Transient                                               | 14 (40.0)         | 11 (40.7)       |              |
| ESKD                                                    |                   |                 |              |
| 12 months                                               | 21 (60.0)         | 16 (59.3)       | 0.953        |
| Death                                                   | 18 (51.4)         | 7 (25.9)        | <b>0.042</b> |
| Infection                                               | 17 (48.6)         | 13 (48.1)       | 0.531        |
| Time of FU after renal involvement, median (IQR) months | 68 (37.0 - 127.0) | 20 (8.0 - 43.0) | 0.775        |
